# Supplementary material
Source: HighWire-hosted journal article supplement (https://thorax.bmj.com/content/thorax-2023-220012)
Supplement: inline-supplementary-material-1 [file inline-supplementary-material-1.xlsx]

## Sheet: Table S1
Supplementary Table 1 SNPs used as genetic instruments for smoking initiation.
SNP	EA	OA	EAF	BETA	SE	P	F-statistica
rs12130857	A	G	0.324968	-0.0180031	0.00272026	3.65e-11	43.8
rs301807	G	A	0.57	0.0180144	0.00257349	2.5e-12	49
rs3820277	T	G	0.526	-0.0188369	0.00255159	1.57e-13	54.5
rs1889571	G	T	0.131	0.0221798	0.00377614	4.19e-09	34.5
rs10914684	A	G	0.324	-0.0158038	0.00272237	6.32e-09	33.7
rs2637869	A	G	0.297	0.0182201	0.00278829	6.54e-11	42.7
rs12755632	G	A	0.316	-0.0154051	0.00274045	1.93e-08	31.6
rs951740	A	G	0.625	0.0295409	0.00263171	3.82e-29	126
rs925524	G	A	0.71	0.0155573	0.0028078	2.94e-08	30.7
rs12022778	C	A	0.202	0.0268248	0.00317904	3.18e-17	71.2
rs11587399	T	A	0.221	-0.0178046	0.00307616	7.25e-09	33.5
rs4912332	T	C	0.491	0.0141209	0.00254856	2.94e-08	30.7
rs1937443	G	C	0.563	0.0204362	0.00256861	1.79e-15	63.3
rs1022528	A	G	0.344	0.0174022	0.00268202	8.48e-11	42.1
rs12740789	A	G	0.178	-0.0284973	0.00333079	1.18e-17	73.2
rs80054503	C	T	0.116	-0.0241377	0.0040742	3.1e-09	35.1
rs10789369	G	A	0.615	-0.0234484	0.00261834	3.39e-19	80.2
rs1514176	A	G	0.58	-0.0193002	0.0025814	7.67e-14	55.9
rs10873871	G	A	0.207	0.0174521	0.00314465	2.82e-08	30.8
rs11162019	T	C	0.363	-0.0154947	0.00264954	5.06e-09	34.2
rs1008078	T	C	0.402	0.0228169	0.00259854	1.63e-18	77.1
rs1935571	G	T	0.48	-0.0157204	0.00255018	6.99e-10	38
rs12027999	C	T	0.12	-0.0243588	0.00392068	5.33e-10	38.6
rs45444697	G	C	0.212	0.0196902	0.00311719	2.72e-10	39.9
rs2901785	A	G	0.446	-0.0173083	0.00256313	1.47e-11	45.6
rs147052174	T	G	0.0171	0.0623094	0.00982745	2.3e-10	40.2
rs35656245	A	G	0.276	0.0159456	0.00285016	2.23e-08	31.3
rs12739243	C	T	0.221	-0.0212518	0.00307064	4.45e-12	47.9
rs12563365	A	G	0.556	0.0165589	0.00256428	1.05e-10	41.7
rs876793	C	T	0.349262	-0.0179245	0.00273664	5.69e-11	42.9
rs114976176	C	A	0.351571	-0.0155137	0.00266843	6.04e-09	33.8
rs62106258	C	T	0.047329	-0.045498	0.0060001	3.33e-14	57.5
rs6731872	G	T	0.826	0.0315977	0.00336069	5.35e-21	88.4
rs1022376	C	T	0.515821	-0.0147448	0.00261063	1.66e-08	31.9
rs61533748	C	T	0.384	0.0174357	0.00261962	2.82e-11	44.3
rs72790288	A	G	0.0282	-0.0455318	0.00769627	3.28e-09	35
rs2710634	C	T	0.521	-0.0177614	0.00255039	3.36e-12	48.5
rs62137126	G	A	0.121094	-0.0236911	0.00390536	1.31e-09	36.8
rs1004787	A	G	0.552	0.0284143	0.00256203	1.11e-28	123
rs7598402	G	C	0.492084	-0.0147283	0.00254846	7.38e-09	33.4
rs10490159	T	C	0.394	0.0172365	0.00260741	3.86e-11	43.7
rs1518393	C	A	0.619	0.0168601	0.00262353	1.3e-10	41.3
rs17616642	G	A	0.24687	-0.0165573	0.00295478	2.1e-08	31.4
rs6730325	A	G	0.609782	-0.0146358	0.00261188	2.1e-08	31.4
rs2539706	A	G	0.529947	0.0162454	0.00255273	1.95e-10	40.5
rs7585579	G	C	0.499	0.0203962	0.00260932	5.48e-15	61.1
rs1863161	A	G	0.56094	0.0153394	0.00256728	2.34e-09	35.7
rs359247	T	A	0.638652	0.0220304	0.00265215	9.89e-17	69
rs62180324	A	G	0.212	-0.0195167	0.00311719	3.91e-10	39.2
rs6750107	A	G	0.386875	0.0145651	0.00261598	2.6e-08	31
rs12714017	C	T	0.511	0.0153965	0.00260995	3.65e-09	34.8
rs56208390	G	A	0.123	0.0215636	0.00387919	2.68e-08	30.9
rs11692435	A	G	0.0848	0.0250526	0.00458161	4.47e-08	29.9
rs13392222	C	A	0.139	-0.0234375	0.00368286	1.93e-10	40.5
rs1901477	G	A	0.511	0.030437	0.00260995	2.07e-31	136
rs11889814	C	A	0.128	-0.0210265	0.00381356	3.44e-08	30.4
rs3811038	C	T	0.279	0.0191404	0.00284069	1.58e-11	45.4
rs75210106	T	C	0.176676	-0.0186594	0.00334056	2.33e-08	31.2
rs34399632	G	A	0.232	0.0193504	0.00301835	1.46e-10	41.1
rs74697736	A	G	0.287239	0.0222963	0.00281579	2.43e-15	62.7
rs6756212	T	C	0.535	-0.033888	0.00255441	3.49e-40	176
rs3076896	A	G	0.38988	0.022646	0.00275434	1.99e-16	67.6
rs16826827	C	T	0.124	-0.0222069	0.00386572	9.17e-09	33
rs1445649	C	T	0.538	0.0205716	0.00255553	8.48e-16	64.8
rs1722666	T	C	0.732	0.0160932	0.00287654	2.17e-08	31.3
rs11678980	A	G	0.45	0.0176689	0.00256098	5.19e-12	47.6
rs12474587	T	G	0.429	0.0242306	0.00257423	4.83e-21	88.6
rs357304	C	T	0.727	0.0166757	0.00285986	5.4e-09	34
rs13007361	A	G	0.208	0.0175338	0.00313906	2.29e-08	31.2
rs7600835	A	G	0.342	-0.0151216	0.00268576	1.8e-08	31.7
rs6750529	T	C	0.744	0.0199074	0.00291936	9.26e-12	46.5
rs17229285	T	C	0.505	-0.0154796	0.00254827	1.27e-09	36.9
rs3115418	C	T	0.454	-0.0142249	0.002559	2.79e-08	30.9
rs62193862	A	G	0.0999	0.0238463	0.00424879	1.99e-08	31.5
rs4674916	A	C	0.327671	-0.0180262	0.00271446	3.06e-11	44.1
rs4674993	G	A	0.2	-0.0240053	0.00318518	4.85e-14	56.8
rs11713899	C	A	0.171	0.0187188	0.00338391	3.15e-08	30.6
rs748832	G	A	0.371	0.0172142	0.00263743	6.6e-11	42.6
rs10446419	G	A	0.207	-0.0195626	0.00314465	5.05e-10	38.7
rs13319205	A	T	0.29	0.0165398	0.0028078	3.77e-09	34.7
rs3172494	T	G	0.115	-0.0291267	0.00400086	3.4e-13	53
rs2526390	T	C	0.334	0.0204663	0.00270136	3.62e-14	57.4
rs2276825	C	T	0.245	0.0188756	0.00296235	1.89e-10	40.6
rs2306866	T	A	0.614	-0.0166755	0.00261707	1.89e-10	40.6
rs73831818	G	A	0.057	0.0320435	0.00549541	5.46e-09	34
rs1910236	A	G	0.469	0.0146439	0.00255305	9.91e-09	32.9
rs7640107	T	C	0.430789	-0.014186	0.00257291	3.46e-08	30.4
rs2734390	G	A	0.372	0.0147709	0.00263598	2.09e-08	31.4
rs221988	C	A	0.384	-0.014865	0.00261962	1.43e-08	32.2
rs2196356	C	G	0.288886	-0.0187728	0.002811	2.45e-11	44.6
rs11128203	A	T	0.53	0.020406	0.00255274	1.29e-15	63.9
rs62246017	A	G	0.322639	-0.0161695	0.00272537	3.03e-09	35.2
rs4543050	T	A	0.816	0.0222035	0.00328806	1.45e-11	45.6
rs6782116	T	C	0.415	-0.0146502	0.00258578	1.46e-08	32.1
rs13066050	T	C	0.208	0.0188343	0.00313906	1.93e-09	36
rs12633090	C	G	0.182	-0.0230197	0.00330203	3.16e-12	48.6
rs1549979	T	C	0.615	-0.0245223	0.00262305	8.8e-21	87.4
rs74664784	C	T	0.376	-0.0199109	0.00278808	9.34e-13	51
rs57153235	G	T	0.318	-0.01938	0.00274074	1.56e-12	50
rs6437769	T	C	0.581	0.0142141	0.00258225	3.74e-08	30.3
rs9288999	A	G	0.735	0.0174411	0.00288687	1.5e-09	36.5
rs6438436	T	C	0.816	0.024737	0.00328806	5.33e-14	56.6
rs12053870	G	T	0.541511	0.0156164	0.00255697	1.02e-09	37.3
rs9826984	A	G	0.542	-0.0140529	0.00255718	3.87e-08	30.2
rs2279829	T	C	0.216	-0.0173766	0.00309605	2.05e-08	31.5
rs2319545	A	C	0.149099	0.0232366	0.00357698	8.3e-11	42.2
rs10935779	T	C	0.415	-0.0143272	0.00258578	2.95e-08	30.7
rs963354	A	C	0.687	0.0150489	0.00274753	4.21e-08	30
rs1714521	C	A	0.411	-0.0162953	0.00258949	3.07e-10	39.6
rs1449012	T	C	0.463	-0.0153734	0.00255515	1.77e-09	36.2
rs9850597	A	G	0.816	-0.018571	0.00328806	1.65e-08	31.9
rs1187820	T	C	0.439	-0.0142712	0.00256732	2.69e-08	30.9
rs16828799	T	G	0.156	0.0197692	0.00351124	1.83e-08	31.7
rs9841807	T	C	0.273	0.0162535	0.00285986	1.35e-08	32.3
rs7631379	C	T	0.206	0.0208014	0.00315028	3.94e-11	43.6
rs4140932	A	T	0.431	-0.0140445	0.00257276	4.89e-08	29.8
rs12642744	T	G	0.744	-0.0165908	0.00298945	2.82e-08	30.8
rs59537158	T	C	0.214	0.0224875	0.00310653	4.62e-13	52.4
rs1389171	A	T	0.241	-0.017472	0.00297896	4.45e-09	34.4
rs55944129	C	T	0.267	-0.0175654	0.00287996	1.06e-09	37.2
rs58400863	A	G	0.347	-0.0201719	0.00267653	4.89e-14	56.8
rs7657022	G	A	0.489	0.0182908	0.00254876	7.34e-13	51.5
rs55900829	T	A	0.334806	0.0191319	0.00277595	5.63e-12	47.5
rs112725451	T	C	0.169	0.026092	0.00339977	1.65e-14	58.9
rs1160685	G	C	0.45	0.0153017	0.00256098	2.31e-09	35.7
rs1435479	T	G	0.28748	0.0163905	0.00281508	5.68e-09	33.9
rs3934797	A	G	0.182	-0.0212975	0.00330203	1.12e-10	41.6
rs71602617	T	C	0.216	-0.0177655	0.00317039	2.1e-08	31.4
rs7696257	A	G	0.366	0.0153313	0.00264489	6.78e-09	33.6
rs13109980	A	G	0.326	-0.0221816	0.00271803	3.37e-16	66.6
rs1116690	G	A	0.742	0.0162912	0.00291194	2.16e-08	31.3
rs13110073	C	T	0.395	-0.0246426	0.00260626	3.24e-21	89.4
rs28717373	T	C	0.356165	-0.0164657	0.00266061	6.16e-10	38.3
rs62340589	C	G	0.201	0.0174134	0.00317923	4.31e-08	30
rs12517438	G	T	0.538	0.0153545	0.00255553	1.89e-09	36.1
rs35375873	C	G	0.11	-0.0270102	0.00407195	3.29e-11	44
rs986714	T	A	0.445	-0.0160308	0.0025637	4.13e-10	39.1
rs71592686	C	T	0.274	0.0207374	0.0028566	3.85e-13	52.7
rs2028269	A	G	0.399	0.0161645	0.00260178	5.19e-10	38.6
rs6874731	G	T	0.484	0.0153179	0.00254945	1.83e-09	36.1
rs6452785	T	C	0.474	-0.0268827	0.00255159	4.69e-26	111
rs10805858	T	A	0.335286	0.0181241	0.00269879	1.88e-11	45.1
rs181508347	G	T	0.00965	0.0810758	0.0130327	4.95e-10	38.7
rs42417	T	C	0.691	0.0169296	0.00275725	8.27e-10	37.7
rs72780746	C	T	0.173	-0.025763	0.00336835	2.05e-14	58.5
rs10060196	A	C	0.580606	0.0183116	0.00258191	1.29e-12	50.3
rs72789626	A	T	0.136	-0.0256431	0.00371678	5.13e-12	47.6
rs17165769	G	A	0.394872	0.0159396	0.0026064	9.56e-10	37.4
rs329124	G	A	0.428	-0.0163871	0.00257498	1.96e-10	40.5
rs1385108	T	C	0.239	0.0187045	0.00298746	3.84e-10	39.2
rs1173461	T	C	0.327	0.0166092	0.00271589	9.51e-10	37.4
rs11956866	G	T	0.567	-0.0148382	0.00257133	7.82e-09	33.3
rs3909281	G	T	0.536	0.0210672	0.00255477	1.62e-16	68
rs3843905	T	C	0.403	-0.0151458	0.00259749	5.41e-09	34
rs79476395	G	A	0.0726	0.0333743	0.00491012	1.04e-11	46.2
rs6890961	T	C	0.624	-0.0193109	0.00263031	2.13e-13	53.9
rs4044321	G	A	0.644	-0.022641	0.00266088	1.75e-17	72.4
rs2173019	A	T	0.177	0.028207	0.00333816	2.98e-17	71.4
rs10042827	C	T	0.681	0.0167171	0.00273354	9.41e-10	37.4
rs359431	T	C	0.56	-0.0141982	0.00256669	3.16e-08	30.6
rs1059490	C	T	0.367	-0.0185935	0.00264813	2.16e-12	49.3
rs6932350	A	T	0.454655	0.0149684	0.00256329	5.13e-09	34.1
rs1150668	G	T	0.419	-0.0185103	0.00258689	8.54e-13	51.2
rs1632941	C	T	0.46	-0.0158074	0.00256093	6.67e-10	38.1
rs3218116	T	C	0.256	-0.019843	0.00291936	1.05e-11	46.2
rs160631	G	T	0.731	-0.0172628	0.00287315	1.87e-09	36.1
rs7743165	G	T	0.495	0.0192559	0.00254827	4.15e-14	57.1
rs79180767	T	C	0.253	0.0200919	0.00293071	7e-12	47
rs10945141	A	G	0.263	0.0181417	0.00289389	3.59e-10	39.3
rs17554906	C	G	0.444	0.0141849	0.00256428	3.14e-08	30.6
rs619087	G	A	0.422	0.0142703	0.00257973	3.1e-08	30.6
rs6568832	A	G	0.753851	0.018869	0.00295768	1.74e-10	40.7
rs12195240	A	G	0.285	0.0249108	0.0028224	1.08e-18	77.9
rs6936160	T	C	0.698	0.0201068	0.002775	4.2e-13	52.5
rs12530388	C	A	0.511	-0.0183617	0.00254876	5.83e-13	51.9
rs3800227	G	A	0.742	0.017178	0.00291194	3.64e-09	34.8
rs118202	T	G	0.812	-0.0367484	0.00326089	1.9e-29	127
rs73008357	C	A	0.121	-0.0223095	0.00400046	2.44e-08	31.1
rs9331343	C	T	0.568	-0.0141345	0.00257204	3.9e-08	30.2
rs10698713	A	G	0.0544	-0.033517	0.00561747	2.38e-09	35.6
rs1737329	G	C	0.742	0.0170292	0.00291194	5.08e-09	34.2
rs10272990	C	T	0.327622	-0.0209215	0.00271457	1.27e-14	59.4
rs6948707	G	T	0.419	0.0243472	0.00258225	4.24e-21	88.9
rs10259715	A	T	0.209918	-0.0186739	0.00321678	6.42e-09	33.7
rs13237637	C	G	0.485	-0.0236823	0.00254929	1.54e-20	86.3
rs79631993	C	A	0.216281	-0.0170343	0.0030946	3.67e-08	30.3
rs7809303	A	G	0.325	-0.0214188	0.00272019	3.48e-15	62
rs7802996	T	C	0.166	-0.0208847	0.00342418	1.06e-09	37.2
rs1030015	T	G	0.519564	0.0142896	0.0025501	2.15e-08	31.4
rs4727189	C	T	0.344	0.0148604	0.00268202	3e-08	30.7
rs76841737	G	C	0.103	-0.0231488	0.00419159	3.26e-08	30.5
rs11768481	A	C	0.34	-0.0185561	0.00268957	5.23e-12	47.6
rs1799068	T	G	0.379	0.0166096	0.0026262	2.59e-10	40
rs13437771	G	A	0.155	-0.0271098	0.00352046	1.39e-14	59.3
rs11766326	C	T	0.506	-0.017544	0.00260951	1.79e-11	45.2
rs6968380	A	G	0.681	-0.0234192	0.00273354	1.05e-17	73.4
rs112913817	G	A	0.011318	0.0780558	0.0120443	9.28e-11	42
rs10233018	G	A	0.516	0.0246124	0.00254945	4.77e-22	93.2
rs10953957	A	G	0.386	0.0144058	0.00261707	3.66e-08	30.3
rs77283305	A	G	0.305819	-0.015196	0.00276519	3.91e-08	30.2
rs10279261	A	G	0.618	-0.0188726	0.00262221	6.05e-13	51.8
rs1561112	C	T	0.412815	-0.0152438	0.00258779	3.84e-09	34.7
rs2952251	G	A	0.74437	0.0164125	0.0029965	4.24e-08	30
rs4326350	G	C	0.493	-0.0176137	0.00255297	5.16e-12	47.6
rs11780471	A	G	0.063121	-0.0386779	0.0052392	1.57e-13	54.5
rs11783093	T	C	0.158	-0.0471243	0.00349308	2.07e-41	182
rs1565735	A	T	0.204463	-0.0191637	0.00315905	1.33e-09	36.8
rs7836565	T	C	0.718	-0.0155084	0.00283144	4.36e-08	30
rs13261666	T	G	0.517	-0.0199946	0.00254962	4.36e-15	61.5
rs3850736	G	C	0.474	0.0191284	0.00255159	6.43e-14	56.2
rs2063976	T	C	0.664955	-0.0201814	0.00269927	7.45e-14	55.9
rs6993429	A	C	0.453	-0.0190505	0.00255947	9.87e-14	55.4
rs6986430	C	T	0.222377	-0.0243377	0.00306383	1.99e-15	63.1
rs9987376	G	T	0.574251	-0.0204682	0.00257671	2.01e-15	63.1
rs290601	T	C	0.274	0.0163102	0.0028566	1.14e-08	32.6
rs3847244	T	C	0.47	0.0186717	0.00255274	2.6e-13	53.5
rs11791671	T	C	0.067315	0.0278504	0.00508476	4.24e-08	30
rs7024924	C	T	0.174	0.0188918	0.00336069	1.9e-08	31.6
rs6474609	A	T	0.586731	-0.0155887	0.00258736	1.71e-09	36.3
rs1931431	C	G	0.478	0.0182329	0.00255061	8.56e-13	51.1
rs7867822	G	A	0.673	-0.015097	0.00271589	2.76e-08	30.9
rs10966092	C	T	0.267	-0.0204862	0.00287996	1.12e-12	50.6
rs10969352	A	T	0.5	0.0143467	0.00254814	1.82e-08	31.7
rs4877285	A	G	0.668249	-0.0181318	0.00270594	2.1e-11	44.9
rs1930371	T	C	0.241	-0.017242	0.00297896	7.09e-09	33.5
rs2378662	A	G	0.541	0.0152121	0.00255675	2.67e-09	35.4
rs1927901	C	T	0.553	-0.0141755	0.00256258	3.1e-08	30.6
rs4837631	T	C	0.446	-0.0153574	0.00256313	2.03e-09	35.9
rs1759433	A	G	0.48	0.0153647	0.00255018	1.69e-09	36.3
rs34553878	G	A	0.111	0.0246707	0.00405584	1.17e-09	37
rs7026534	G	T	0.703821	-0.016603	0.00279052	2.68e-09	35.4
rs10858334	G	C	0.14	0.022871	0.00375997	1.18e-09	37
rs10905461	C	T	0.748	-0.0163915	0.00293456	2.36e-08	31.2
rs7920501	A	T	0.465	-0.0155168	0.00255441	1.25e-09	36.9
rs1291821	G	A	0.534	0.014493	0.00255405	1.39e-08	32.2
rs11258417	T	C	0.391	-0.0145136	0.00261094	2.71e-08	30.9
rs7072776	G	A	0.712	-0.0219747	0.00281357	5.66e-15	61
rs2796793	A	G	0.452	0.0144814	0.00255996	1.55e-08	32
rs1733760	C	T	0.51	0.0147734	0.00254865	6.7e-09	33.6
rs7921378	C	G	0.482	-0.0233135	0.0025498	6.1e-20	83.6
rs7901883	A	G	0.230322	-0.0192575	0.00302602	1.98e-10	40.5
rs11594623	C	T	0.234241	0.0274396	0.00300826	7.45e-20	83.2
rs11191269	G	C	0.193294	0.0176426	0.00322646	4.61e-08	29.9
rs28408682	G	A	0.600019	0.0166729	0.00260071	1.41e-10	41.1
rs12244388	A	G	0.35	0.0258153	0.00267118	4.31e-22	93.4
rs111842178	G	A	0.231008	0.0224527	0.00319775	2.24e-12	49.3
rs34970111	T	C	0.458	-0.0145557	0.00255718	1.28e-08	32.4
rs9787523	C	T	0.418	-0.0156273	0.00258312	1.42e-09	36.6
rs11192347	A	G	0.104	-0.02645	0.00427392	6.15e-10	38.3
rs10885480	C	T	0.284	-0.0186775	0.00282539	3.83e-11	43.7
rs4752018	A	C	0.231	0.0188538	0.00302291	4.42e-10	38.9
rs9423279	G	C	0.645	-0.0185808	0.00266256	3.06e-12	48.7
rs6265	T	C	0.188	-0.0292755	0.00326089	2.81e-19	80.6
rs4275621	G	A	0.382	-0.0213674	0.00262221	3.76e-16	66.4
rs62618693	T	C	0.0428	-0.0352724	0.00629463	2.09e-08	31.4
rs2939756	A	G	0.48	-0.0156997	0.00255018	7.45e-10	37.9
rs1381775	C	T	0.712	-0.0156147	0.00281357	2.79e-08	30.8
rs2959084	A	G	0.704674	0.0170799	0.00279286	9.82e-10	37.4
rs3740977	C	T	0.167	0.019474	0.00341596	1.17e-08	32.5
rs61886926	T	C	0.384	-0.0179401	0.00261962	7.3e-12	46.9
rs61884449	T	C	0.149183	0.0199753	0.00357615	2.32e-08	31.2
rs644740	T	C	0.457	-0.0140785	0.00255762	3.67e-08	30.3
rs7943721	A	G	0.829	-0.0212136	0.00338391	3.58e-10	39.3
rs7929518	G	A	0.773	0.0192363	0.00304152	2.55e-10	40
rs586699	A	G	0.543	-0.0148033	0.00255762	7.29e-09	33.5
rs76460663	G	C	0.041056	-0.04235	0.00642109	4.15e-11	43.5
rs2155646	C	T	0.4	0.0377772	0.00260069	9.44e-48	211
rs78239456	T	A	0.376527	-0.0184952	0.00271227	9.37e-12	46.5
rs1713676	G	A	0.522512	-0.0167262	0.00255073	5.38e-11	43
rs238896	A	G	0.49	-0.0168674	0.00254865	3.65e-11	43.8
rs540860	G	A	0.543	0.0176086	0.00255762	5.75e-12	47.4
rs1944689	T	G	0.785911	0.01768	0.00310606	1.27e-08	32.4
rs1834306	G	A	0.579399	-0.0144852	0.00258089	1.96e-08	31.5
rs1106363	T	C	0.344579	0.0173746	0.00268095	9.2e-11	42
rs2010921	A	G	0.311	0.0174291	0.00275235	2.47e-10	40.1
rs11057005	G	A	0.441	-0.0157139	0.00256607	9.12e-10	37.5
rs13906	T	C	0.109	-0.0245297	0.00408829	1.98e-09	36
rs4759229	G	A	0.656	0.0155696	0.00268202	6.53e-09	33.7
rs7969559	G	A	0.713	-0.0170159	0.00281649	1.53e-09	36.5
rs7134009	C	T	0.287	-0.0157969	0.00288411	4.3e-08	30
rs77215829	C	A	0.131	-0.0240447	0.00378293	2.02e-10	40.4
rs1109480	A	G	0.384	-0.0166917	0.00261962	1.84e-10	40.6
rs11611651	A	G	0.0868	0.0271143	0.00452534	2.05e-09	35.9
rs17197663	A	G	0.125	-0.0215874	0.00385243	2.06e-08	31.4
rs4264267	T	C	0.527042	0.0147921	0.00255188	6.82e-09	33.6
rs61959481	A	G	0.21	-0.0203442	0.00312803	7.95e-11	42.3
rs3098272	C	A	0.798794	-0.0178082	0.00317801	2.08e-08	31.4
rs9538162	C	T	0.415874	0.0173792	0.00258499	1.76e-11	45.2
rs1413119	T	C	0.396318	-0.0152551	0.00260476	4.77e-09	34.3
rs56367474	T	C	0.304	-0.0172975	0.00276982	4.2e-10	39
rs55786907	G	A	0.162492	0.0194452	0.00345369	1.84e-08	31.7
rs4886207	C	T	0.637	-0.0162467	0.00264954	8.78e-10	37.6
rs9540731	T	C	0.509	-0.0177303	0.00254856	3.42e-12	48.4
rs9545155	C	T	0.478	-0.0160709	0.00255061	3.04e-10	39.7
rs1772572	A	C	0.324132	-0.0168681	0.00272208	5.62e-10	38.4
rs75674569	A	G	0.0997	-0.0253377	0.00425258	2.58e-09	35.5
rs7333559	A	G	0.783	-0.0232125	0.00309088	5.94e-14	56.4
rs1108130	A	T	0.212	0.0239436	0.00311719	1.57e-14	59
rs12855717	T	C	0.538	0.0155237	0.00255553	1.22e-09	36.9
rs12878369	A	C	0.414762	0.0174373	0.00258792	1.6e-11	45.4
rs2145451	C	T	0.193	-0.0200462	0.00323073	5.44e-10	38.5
rs9323328	G	A	0.537	-0.014237	0.00255705	2.55e-08	31
rs1811739	A	G	0.248	0.0182718	0.00295244	5.97e-10	38.3
rs8005334	G	T	0.36	0.0166734	0.00265629	3.44e-10	39.4
rs34940743	G	A	0.346	0.0159249	0.00268034	2.8e-09	35.3
rs2925128	T	C	0.385191	0.0168199	0.00268304	3.67e-10	39.3
rs1381287	T	C	0.467	0.0180166	0.00255561	1.81e-12	49.7
rs55913542	T	G	0.175	0.0185623	0.0033556	3.25e-08	30.6
rs1435672	C	T	0.56	0.0141051	0.00256669	3.82e-08	30.2
rs281296	A	G	0.357	0.0246892	0.00265922	1.59e-20	86.2
rs1435741	A	G	0.432951	0.0183091	0.00257137	1.09e-12	50.7
rs56902655	G	T	0.136	-0.0218628	0.00371678	4.09e-09	34.6
rs2289791	T	G	0.247	-0.0177255	0.00295425	2.01e-09	36
rs60833441	G	A	0.461	-0.0142766	0.00255593	2.28e-08	31.2
rs62007780	T	G	0.416	-0.0159133	0.00258488	7.48e-10	37.9
rs12442563	T	G	0.223	-0.0232296	0.00306077	3.13e-14	57.6
rs4310804	G	C	0.247	-0.0181873	0.00295425	7.55e-10	37.9
rs8027457	C	T	0.511	0.0153138	0.00254876	1.88e-09	36.1
rs1139897	A	G	0.23	-0.0240872	0.0030275	1.77e-15	63.3
rs11076962	C	T	0.279	0.0182999	0.00284069	1.2e-10	41.5
rs7192140	C	T	0.498	-0.0168834	0.00254816	3.4e-11	43.9
rs9922607	T	C	0.2	-0.0221593	0.00318518	3.42e-12	48.4
rs9941217	G	C	0.352204	-0.0185567	0.00266733	3.5e-12	48.4
rs7188873	G	A	0.612998	0.0202958	0.00261582	8.46e-15	60.2
rs6497840	A	G	0.707	0.0227703	0.00286651	2.01e-15	63.1
rs4785187	A	G	0.223	0.0199772	0.00306077	6.55e-11	42.6
rs8050598	T	C	0.254117	0.0186698	0.00292645	1.76e-10	40.7
rs12918191	G	A	0.243	-0.019727	0.00297059	3.14e-11	44.1
rs9302604	G	A	0.435	0.0187095	0.00256995	3.29e-13	53
rs9936784	G	T	0.53418	0.0139895	0.00255412	4.33e-08	30
rs62052916	T	A	0.0701	-0.0319138	0.00499018	1.62e-10	40.9
rs4788676	C	T	0.228528	-0.017745	0.00303434	4.92e-09	34.2
rs61537885	C	T	0.037215	-0.0400626	0.00694251	8.06e-09	33.3
rs117657830	G	A	0.0417	-0.0377597	0.00637345	3.18e-09	35.1
rs1050847	T	C	0.559	-0.01483	0.00256607	7.37e-09	33.4
rs11642231	A	G	0.369	-0.0155983	0.00264038	3.44e-09	34.9
rs4790874	T	C	0.532	0.0174491	0.00255338	8.43e-12	46.7
rs11078713	G	A	0.419348	-0.0145829	0.00258195	1.59e-08	31.9
rs28441558	C	T	0.0563	-0.035565	0.00552742	1.24e-10	41.4
rs11651955	A	G	0.499	-0.0140264	0.00254815	3.74e-08	30.3
rs67777803	T	G	0.172	-0.0246015	0.00337609	3.18e-13	53.1
rs2344976	C	T	0.612	-0.0150877	0.00261458	7.98e-09	33.3
rs3764351	A	G	0.657	-0.0147492	0.00268389	3.89e-08	30.2
rs72836318	C	T	0.246	-0.0171223	0.00295829	7e-09	33.5
rs17692129	T	C	0.331	0.0195989	0.00270749	4.57e-13	52.4
rs75919030	C	T	0.267	-0.0209664	0.00287996	3.35e-13	53
rs2938134	A	C	0.673	-0.017501	0.00278109	3.14e-10	39.6
rs2587507	C	T	0.502	-0.0146602	0.00254816	8.69e-09	33.1
rs34342129	C	T	0.509	-0.014281	0.00254856	2.13e-08	31.4
rs4476253	A	G	0.24	-0.0184862	0.00298319	5.78e-10	38.4
rs7505855	T	C	0.586	-0.0169818	0.00258669	5.31e-11	43.1
rs8096225	C	A	0.703	0.0155245	0.00278829	2.63e-08	31
rs67050670	G	A	0.229	-0.0202723	0.00303214	2.34e-11	44.7
rs2359180	G	A	0.369	-0.0143894	0.00264038	4.98e-08	29.7
rs72898831	G	A	0.155	-0.0244159	0.00352046	4.14e-12	48.1
rs8083764	T	G	0.306171	-0.0159517	0.0027643	7.97e-09	33.3
rs1373178	G	T	0.588	-0.0203164	0.00258855	4.16e-15	61.6
rs62098013	A	G	0.365322	0.01771	0.00264593	2.24e-11	44.8
rs72938304	A	G	0.113	-0.0272051	0.00402432	1.36e-11	45.7
rs11872397	A	G	0.253	-0.0171139	0.00293071	5.2e-09	34.1
rs71367544	T	C	0.203	0.0205522	0.0031675	8.54e-11	42.1
rs76608582	A	C	0.0489	-0.0345493	0.0059078	4.88e-09	34.2
rs10853981	A	G	0.33036	0.0147872	0.00270881	4.88e-08	29.8
rs113230003	A	G	0.255	-0.0188761	0.00292311	1.05e-10	41.7
rs8103660	C	T	0.354431	0.0158026	0.00266352	3.03e-09	35.2
rs117734003	C	G	0.0673	0.0302991	0.00508528	2.57e-09	35.5
rs1126757	T	C	0.473	0.0141623	0.00255186	2.92e-08	30.8
rs6050446	G	A	0.971	0.0544098	0.00761144	8.8e-13	51.1
rs6058782	T	C	0.908	0.0297103	0.00441915	1.78e-11	45.2
rs1555445	T	A	0.318	0.0187626	0.00274264	7.75e-12	46.8
rs6073075	A	T	0.824	-0.018704	0.00335394	2.44e-08	31.1
rs910912	C	T	0.739	-0.0167699	0.00290609	7.82e-09	33.3
rs6011779	T	C	0.806	-0.0191766	0.00322763	2.83e-09	35.3
rs3810496	C	T	0.619436	0.0158813	0.00262869	1.54e-09	36.5
rs4818005	A	G	0.581	-0.020431	0.00264425	1.09e-14	59.7
rs139896	C	T	0.648	0.0154404	0.00266769	7.14e-09	33.5
rs4822102	T	C	0.618	-0.0165428	0.00262221	2.78e-10	39.8
rs9627272	C	G	0.407	-0.0154737	0.0025934	2.42e-09	35.6
Abbreviations: EA, effect allele; OA, other allele; SE, standard error; SNP, single-nucleotide polymorphism.
aThe F-statistic was estimated using the following formula: Beta^2/SE^2, where Beta is the estimated coefficient of the SNP and SE is the standard error of the estimated coefficient.

## Sheet: Table S2
Supplementary Table 2 SNPs used as genetic instruments for lifetime smoking.
SNP	EA	OA	EAF	BETA	SE	P	F-statistica
rs8042849	C	T	0.342	0.028	0.002	1.8e-39	196
rs113382419	C	A	0.889	-0.041	0.003	3e-37	186.778
rs6011779	C	T	0.191	0.028	0.003	2.3e-27	87.1111
rs9919670	G	A	0.612	-0.022	0.002	7.6e-27	121
rs2890772	G	T	0.413	-0.02	0.002	2.1e-22	100
rs35175834	G	A	0.788	-0.024	0.002	4.6e-22	144
rs12244388	G	A	0.661	-0.019	0.002	1.4e-19	90.25
rs11783093	C	T	0.839	0.023	0.003	1.2e-16	58.7778
rs11210229	A	G	0.384	0.017	0.002	2e-16	72.25
rs62155874	A	G	0.873	-0.024	0.003	5.2e-16	64
rs10226228	A	G	0.63	-0.016	0.002	2e-15	64
rs6119897	G	A	0.762	-0.018	0.002	3.6e-15	81
rs2867112	T	G	0.835	0.021	0.003	4.8e-15	49
rs986391	G	A	0.367	0.016	0.002	9.4e-15	64
rs3742365	T	C	0.595	-0.016	0.002	2.5e-14	64
rs2401924	G	C	0.502	0.015	0.002	2.7e-14	56.25
rs7807019	A	G	0.54	-0.015	0.002	6.7e-14	56.25
rs549845	G	A	0.301	0.016	0.002	8.3e-14	64
rs10922907	A	T	0.451	0.015	0.002	3e-13	56.25
rs7569203	A	C	0.689	-0.016	0.002	7.4e-13	64
rs17309874	G	A	0.74	-0.016	0.002	9.7e-13	64
rs6778080	T	C	0.267	0.016	0.002	1.3e-12	64
rs8042134	T	G	0.541	-0.014	0.002	1.3e-12	49
rs17576594	G	A	0.724	0.016	0.002	1.7e-12	64
rs7766610	C	A	0.183	0.018	0.003	2.2e-12	36
rs1922018	C	T	0.364	0.014	0.002	3e-12	49
rs7553348	G	A	0.438	0.014	0.002	5.2e-12	49
rs7528604	G	A	0.566	0.014	0.002	5.7e-12	49
rs329120	C	T	0.581	0.014	0.002	6.3e-12	49
rs12623702	A	G	0.613	-0.014	0.002	7.7e-12	49
rs13296519	G	T	0.606	-0.014	0.002	8.1e-12	49
rs6935954	A	G	0.421	0.014	0.002	8.2e-12	49
rs4671357	T	C	0.519	-0.014	0.002	1.1e-11	49
rs3896224	A	G	0.585	0.014	0.002	1.1e-11	49
rs326341	G	A	0.525	0.014	0.002	1.2e-11	49
rs4391802	A	G	0.707	0.015	0.002	1.4e-11	56.25
rs72678864	G	A	0.829	0.018	0.003	1.6e-11	36
rs112282219	G	A	0.959	-0.033	0.005	3.8e-11	43.56
rs10879871	T	G	0.343	-0.014	0.002	5e-11	49
rs889398	C	T	0.588	0.013	0.002	6.3e-11	42.25
rs4473348	A	T	0.25	-0.015	0.002	6.4e-11	56.25
rs1221148	C	G	0.587	0.013	0.002	7.3e-11	42.25
rs317021	T	A	0.814	-0.017	0.003	1.1e-10	32.1111
rs1933270	T	G	0.364	0.013	0.002	1.5e-10	42.25
rs8614	C	A	0.817	-0.017	0.003	1.8e-10	32.1111
rs11255908	T	G	0.743	-0.015	0.002	2.3e-10	56.25
rs13153393	A	G	0.884	-0.02	0.003	2.5e-10	44.4444
rs2678670	A	T	0.486	0.013	0.002	3.1e-10	42.25
rs7333559	G	A	0.212	0.015	0.002	3.2e-10	56.25
rs76608582	C	A	0.953	0.031	0.005	3.2e-10	38.44
rs421983	T	C	0.519	0.013	0.002	3.3e-10	42.25
rs4543592	T	C	0.52	-0.012	0.002	4.5e-10	36
rs11948770	T	C	0.768	-0.015	0.002	4.9e-10	56.25
rs7039819	G	A	0.427	0.013	0.002	5.1e-10	42.25
rs10282292	C	T	0.362	0.013	0.002	5.9e-10	42.25
rs2838834	C	T	0.699	-0.013	0.002	6.3e-10	42.25
rs624833	T	G	0.695	0.013	0.002	6.6e-10	42.25
rs62135536	C	T	0.968	0.035	0.006	8e-10	34.0278
rs3811038	T	C	0.724	-0.014	0.002	8.9e-10	49
rs359243	T	C	0.393	-0.013	0.002	9.5e-10	42.25
rs11768481	C	A	0.666	0.013	0.002	9.9e-10	42.25
rs6779302	G	T	0.633	-0.013	0.002	1.2e-09	42.25
rs35169606	T	G	0.612	0.013	0.002	1.2e-09	42.25
rs67596067	G	A	0.649	-0.013	0.002	1.2e-09	42.25
rs2675638	G	A	0.581	0.012	0.002	1.3e-09	36
rs75742406	G	A	0.739	0.014	0.002	1.3e-09	49
rs71367545	G	A	0.791	-0.015	0.002	1.4e-09	56.25
rs71627581	G	A	0.889	0.019	0.003	1.6e-09	40.1111
rs13016665	C	A	0.577	-0.012	0.002	1.8e-09	36
rs369230	G	T	0.308	-0.013	0.002	1.8e-09	42.25
rs10052591	T	C	0.573	0.012	0.002	2.1e-09	36
rs3769949	T	A	0.528	-0.012	0.002	2.5e-09	36
rs7155595	A	C	0.674	-0.013	0.002	2.5e-09	42.25
rs7077678	C	T	0.623	0.012	0.002	2.6e-09	36
rs860326	C	T	0.428	0.012	0.002	2.7e-09	36
rs12202536	A	G	0.513	-0.012	0.002	2.8e-09	36
rs4814873	C	T	0.767	0.014	0.002	2.9e-09	49
rs147412694	G	A	0.85	-0.017	0.003	2.9e-09	32.1111
rs9842947	C	T	0.326	-0.013	0.002	3.1e-09	42.25
rs2894808	T	A	0.922	-0.022	0.004	3.5e-09	30.25
rs12708665	A	G	0.285	-0.013	0.002	3.5e-09	42.25
rs202645	A	G	0.203	-0.015	0.002	3.9e-09	56.25
rs62098013	G	A	0.64	-0.012	0.002	4.1e-09	36
rs4957528	A	C	0.208	-0.015	0.002	4.2e-09	56.25
rs1246265	T	C	0.305	-0.013	0.002	4.2e-09	42.25
rs6598539	T	C	0.489	-0.012	0.002	4.5e-09	36
rs13009008	A	G	0.328	0.012	0.002	4.6e-09	36
rs17553262	A	C	0.885	-0.018	0.003	5.3e-09	36
rs7297175	T	C	0.431	-0.012	0.002	6.6e-09	36
rs245774	A	G	0.272	-0.013	0.002	7.4e-09	42.25
rs6962772	A	G	0.846	0.016	0.003	7.8e-09	28.4444
rs12481282	G	C	0.722	-0.013	0.002	7.8e-09	42.25
rs35343344	C	A	0.733	0.013	0.002	8.8e-09	42.25
rs6562474	C	G	0.651	0.012	0.002	1e-08	36
rs775758	A	T	0.433	0.012	0.002	1.1e-08	36
rs2062882	G	A	0.587	-0.012	0.002	1.1e-08	36
rs7519626	C	T	0.324	0.012	0.002	1.2e-08	36
rs9435340	T	A	0.344	0.012	0.002	1.2e-08	36
rs34866095	A	G	0.686	-0.012	0.002	1.2e-08	36
rs348809	A	G	0.348	-0.012	0.002	1.3e-08	36
rs1050847	C	T	0.426	0.011	0.002	1.4e-08	30.25
rs73220544	A	C	0.842	-0.016	0.003	1.5e-08	28.4444
rs4571506	C	T	0.54	0.011	0.002	1.5e-08	30.25
rs732083	G	A	0.333	0.012	0.002	1.5e-08	36
rs6741228	T	C	0.433	0.011	0.002	1.6e-08	30.25
rs4949465	T	C	0.87	-0.017	0.003	1.7e-08	32.1111
rs62175972	T	C	0.966	0.031	0.006	1.7e-08	26.6944
rs136233	A	G	0.809	-0.014	0.003	1.8e-08	21.7778
rs12831617	C	T	0.764	-0.013	0.002	1.9e-08	42.25
rs11861214	G	T	0.784	0.014	0.002	2e-08	49
rs10918701	G	A	0.372	0.012	0.002	2.1e-08	36
rs10823968	A	T	0.633	0.012	0.002	2.1e-08	36
rs74086911	G	A	0.925	0.021	0.004	2.1e-08	27.5625
rs4731925	C	T	0.316	-0.012	0.002	2.6e-08	36
rs28485305	C	T	0.631	0.012	0.002	2.6e-08	36
rs1193237	G	C	0.439	-0.011	0.002	2.8e-08	30.25
rs60952428	T	C	0.909	0.019	0.003	3e-08	40.1111
rs9904288	T	C	0.708	0.012	0.002	3.1e-08	36
rs12967855	A	G	0.331	0.012	0.002	3.1e-08	36
rs2254710	C	A	0.236	0.013	0.002	3.5e-08	42.25
rs72674867	A	T	0.765	0.013	0.002	3.8e-08	42.25
rs1931263	G	T	0.51	-0.011	0.002	4e-08	30.25
rs57611503	G	A	0.485	0.011	0.002	4e-08	30.25
rs61796681	A	T	0.912	-0.019	0.004	4.2e-08	22.5625
rs6957896	C	T	0.503	-0.011	0.002	4.5e-08	30.25
rs2080870	A	T	0.258	0.012	0.002	4.9e-08	36
Abbreviations: EA, effect allele; OA, other allele; SE, standard error; SNP, single-nucleotide polymorphism.
aThe F-statistic was estimated using the following formula: Beta^2/SE^2, where Beta is the estimated coefficient of the SNP and SE is the standard error of the estimated coefficient.

## Sheet: Table S3
Supplementary Table 3 SNPs used as genetic instruments for idiopathic pulmonary fibrosis.
SNP	EA	OA	EAF	BETA	SE	P	F-statistica
rs4233306	C	T	0.802	0.2068	0.0349894	3.41357e-09	34.9324
rs2292181	G	C	0.948	-0.4199	0.057859	3.9489e-13	52.6684
rs9860874	C	A	0.276	-0.2572	0.0298253	6.49092e-18	74.3656
rs2609259	C	A	0.776	-0.2642	0.0316169	6.4725e-17	69.8275
rs7725218	G	A	0.329	0.3464	0.0294037	4.90175e-32	138.788
rs2076295	G	T	0.467	0.3966	0.0270852	1.49989e-48	214.409
rs1214759	G	A	0.679	0.1652	0.0292984	1.71496e-08	31.7932
rs12537430	G	A	0.625	0.2468	0.0284552	4.19875e-18	75.2257
rs2897075	C	T	0.618	-0.2628	0.0276121	1.77291e-21	90.5839
rs10808505	G	T	0.427	-0.1786	0.0272959	6.02581e-11	42.8121
rs11788059	C	T	0.342	0.1547	0.0283498	4.84737e-08	29.7769
rs7100920	C	T	0.51	-0.1744	0.0272959	1.66726e-10	40.8222
rs79684490	G	A	0.954	-0.3347	0.0607045	3.51578e-08	30.3997
rs35705950	G	T	0.855	-1.6219	0.0390996	9.09E-438	1720.69
rs9577395	G	C	0.209	-0.2558	0.0339355	4.7786e-14	56.8189
rs2304645	G	C	0.474	-0.2466	0.0270852	8.65733e-20	82.894
rs11073517	C	T	0.673	-0.175	0.0288768	1.35927e-09	36.7264
rs74614704	G	A	0.841	-0.4013	0.057332	2.56734e-12	48.9941
rs12610495	G	A	0.306	0.2495	0.0304576	2.57551e-16	67.104
rs41308092	G	A	0.979	-0.5576	0.0941131	3.12698e-09	35.1031
rs12912339	A	G	0.159	0.262364	0.0353784	7.41e-13	54.9962
rs2077551	T	C	0.807	0.350657	0.0376622	1.92e-20	86.6867
rs112087793	C	T	0.915	0.29267	0.0513831	1.09e-08	32.4425
Abbreviations: EA, effect allele; OA, other allele; SE, standard error; SNP, single-nucleotide polymorphism.
aThe F-statistic was estimated using the following formula: Beta^2/SE^2, where Beta is the estimated coefficient of the SNP and SE is the standard error of the estimated coefficient.

## Sheet: Table S4
Supplementary Table 4 Associations of genetic liability to idiopathic pulmonary fibrosis with smoking initiation and lifetime smoking in the reverse MR analysis.
Outcome	Method	OR/betaa (95% CI)	P	IVW Q statistic (P)	MR-Egger intercept (P)	No. of outliers detected by MR-PRESSO
Smoking initiation	IVW (random effects)	1.00 (0.99, 1.01)	0.720063	50 (<0.001)
	Weighted median	1.00 (1.00, 1.01)	0.637807
	MR-Egger	1.00 (0.99, 1.02)	0.689327		-0.001 (0.811)
	MR-PRESSO	1.00 (0.99, 1.01)	0.723484			0
Lifetime smoking	IVW (random effects)	0.002 (-0.002, 0.005)	0.377894	81 (<0.001)
	Weighted median	0.001 (-0.002, 0.004)	0.457257		0.000 (0.963)
	MR-Egger	0.002 (-0.004, 0.007)	0.621593
	MR-PRESSO	0.002 (-0.002, 0.005)	0.430332			0
Abbreviations: CI, confidence interval; MR, Mendelian randomization; PRESSO, pleiotropy residual sum and outlier; OR, odds ratio.
aEstimates are expressed as OR for smoking initiation (a binary outcome) and as beta for lifetime smoking (a continuous outcome).
